# Supplementary material for: New perspectives on fertility in transwomen with regard to spermatogonial stem cells
Source: PubMed Central journal article supplement (PMC9874957; doi:10.1530/raf-22-0022), 2023-01-18

A

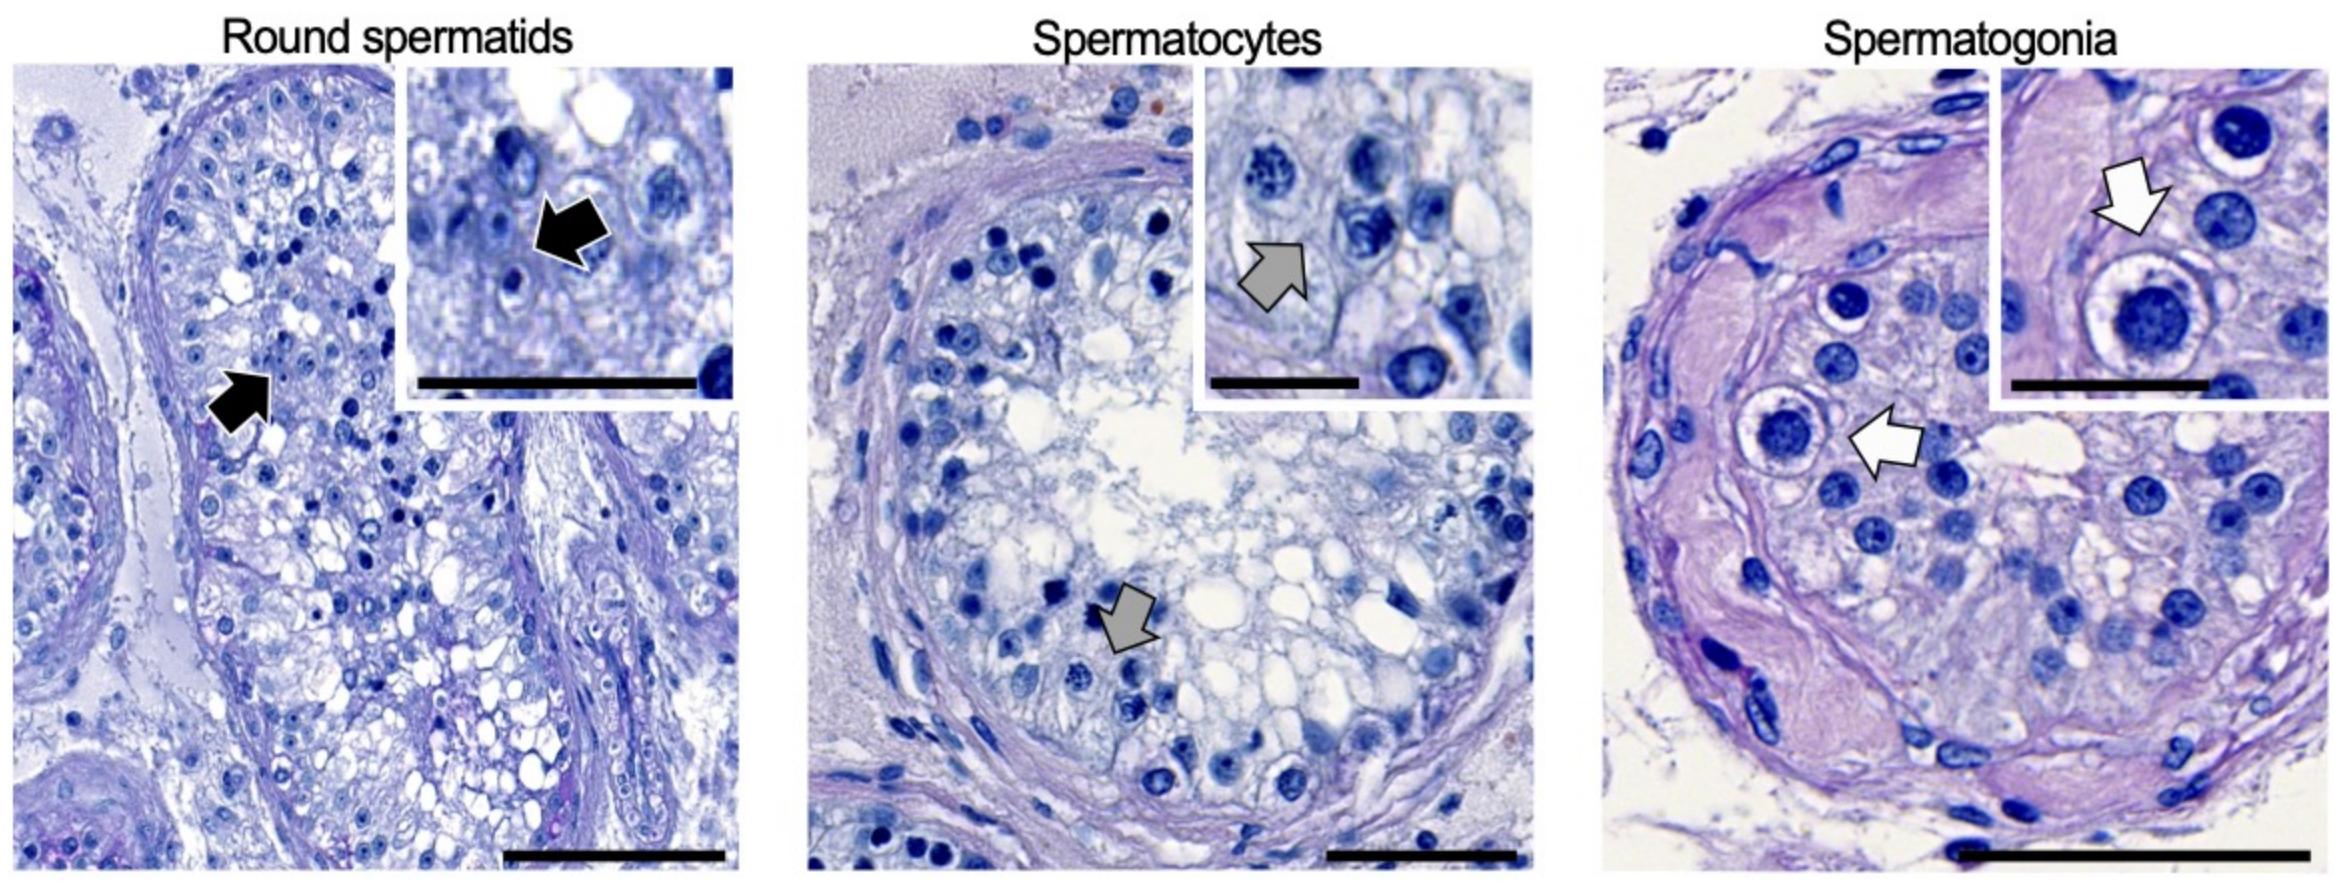

B

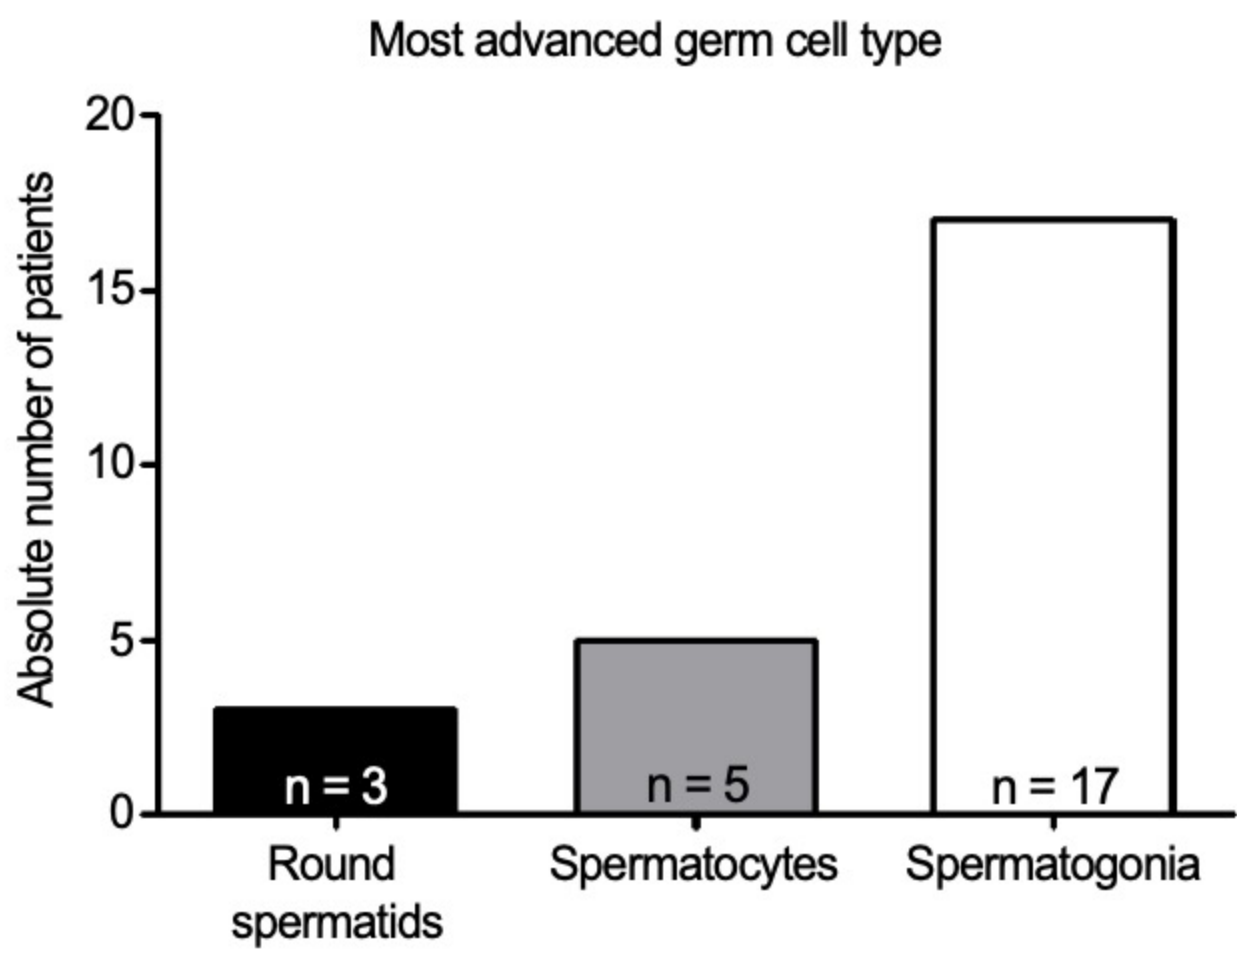

Supplement: supplementary_figure_1.pdf [file supplementary_figure_1.pdf]
